# Supplementary material for: Pt decorated Artocarpus heterophyllus seed derived carbon as an anode catalyst for DMFC application
Source: Royal Society of Chemistry journal article supplement (doi:10.1039/c6ra05833g), 2016-01-01
Supplement: c6ra05833g1.pdf [file c6ra05833g1.pdf]

## Supporting Information

### Pt decorated *Artocarpus Heterophyllus* Seed derived Carbon as anode catalyst for DMFC application

P.Rupa kasturi<sup>a</sup>, R.Kalai Selvan<sup>a</sup> Yun Sung Lee<sup>b</sup>,

- a. Solid State Ionics and Energy devices Laboratory, Department of Physics, Bharathiar University, Coimbatore, Tamil Nadu, India-641 046
- b. Faculty of Applied Chemical Engineering, Chonnam National University, Gwangju 500-757, South Korea

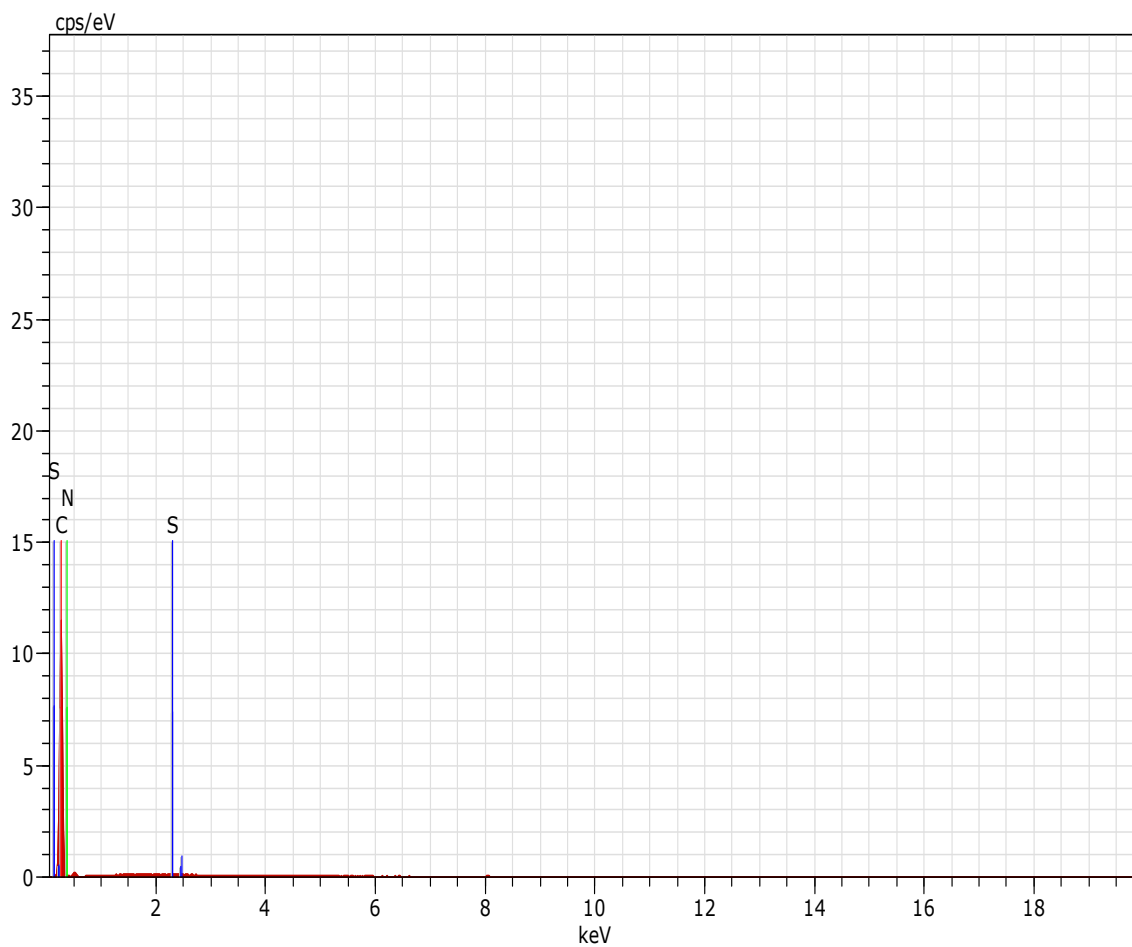

Fig. S1 EDX spectra of Hydrochar samples at 180°C.

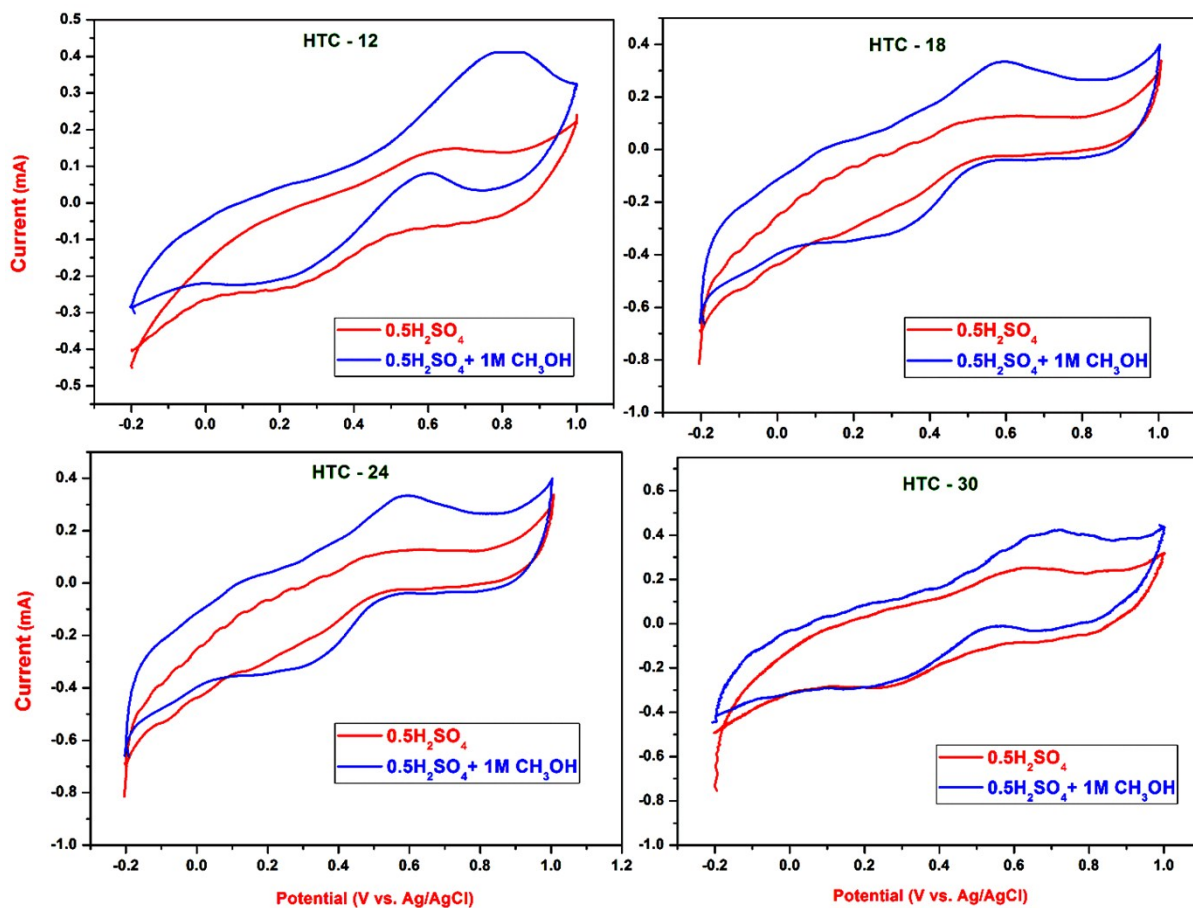

Fig. S2 CV images of hydrochar at a) 12h, b) 18h c) 24h, and d) 30h of samples autoclaved at 180°C.
